# Supplementary material for: The effects of GelMA hydrogel on nerve repair and regeneration in mice with spinal cord injury
Source: PubMed Central journal article supplement — Ann Transl Med. 2021 Jul;9(14):1147. doi: 10.21037/atm-21-2874 (PMC8350630; doi:10.21037/atm-21-2874), 2021-07
Supplement: atm-09-14-1147-dss.pdf [file atm-09-14-1147-dss.pdf]

## Data Sharing Statement

|                     |                                                                                                                                                     |                                                                                                                                                                                                                                                                            |
|---------------------|-----------------------------------------------------------------------------------------------------------------------------------------------------|----------------------------------------------------------------------------------------------------------------------------------------------------------------------------------------------------------------------------------------------------------------------------|
| <b>Article Info</b> | <a href="https://dx.doi.org/10.21037/atm-21-2874">https://dx.doi.org/10.21037/atm-21-2874</a>                                                       |                                                                                                                                                                                                                                                                            |
| <b>Item</b>         | <b>Question</b>                                                                                                                                     | <b>Authors' Response<br/>(place "-" if not applicable)</b>                                                                                                                                                                                                                 |
| 1                   | Would you like to share data collected for your study to others?                                                                                    | Yes.                                                                                                                                                                                                                                                                       |
| 2                   | If not, would you like to share the reason for your decision?                                                                                       | -                                                                                                                                                                                                                                                                          |
| 3                   | What data in particular will be shared?                                                                                                             | The bedside motility scale (BMS) scores will be shared. The data of axon length of the neurons and syringomyelia area after intervention with GelMA hydrogel will be shared. The data of expression of growth associated protein (GAP)43, nestin, and GFAP will be shared. |
| 4                   | Any other documents will be shared? Such as study protocol, statistical analysis plan, informed consent form, clinical study report, analytic code. | Study protocol, Statistical analysis plan, informed consent form, and clinical study report will also be shared if requested.                                                                                                                                              |
| 5                   | When will data availability begin?                                                                                                                  | From the publication date.                                                                                                                                                                                                                                                 |
| 6                   | When will data availability end?                                                                                                                    | Two years within the publication date, since the technique or survival date may be updated over time.                                                                                                                                                                      |
| 7                   | To whom will you share the data?                                                                                                                    | Spinal cord and nerve researchers who are interested in studies of GelMA hydrogel.                                                                                                                                                                                         |
| 8                   | For what type of analysis or purpose?                                                                                                               | For analysis to evaluate the safety of GelMA hydrogel in spinal cord injury patients.                                                                                                                                                                                      |
| 9                   | How or where can the data/documents be obtained?                                                                                                    | Emails could be sent to the address below to obtain the shared data:<br>sajilafu2020@126.com.                                                                                                                                                                              |
| 10                  | Any other restrictions?                                                                                                                             | We may balance the potential benefits and risks for each request and then provide the data that could be shared.                                                                                                                                                           |
